# Supplementary material for: APOBEC Mutagenesis Is Concordant between Tumor and Viral Genomes in HPV-Positive Head and Neck Squamous Cell Carcinoma
Source: MDPI journal article supplement (doi:10.3390/v13081666), 2021-08-23

**Figure S1** Mutational signatures ordered by APOBEC contribution (magenta) in HPV+ OPSCC samples. Y axis= number of mutations.

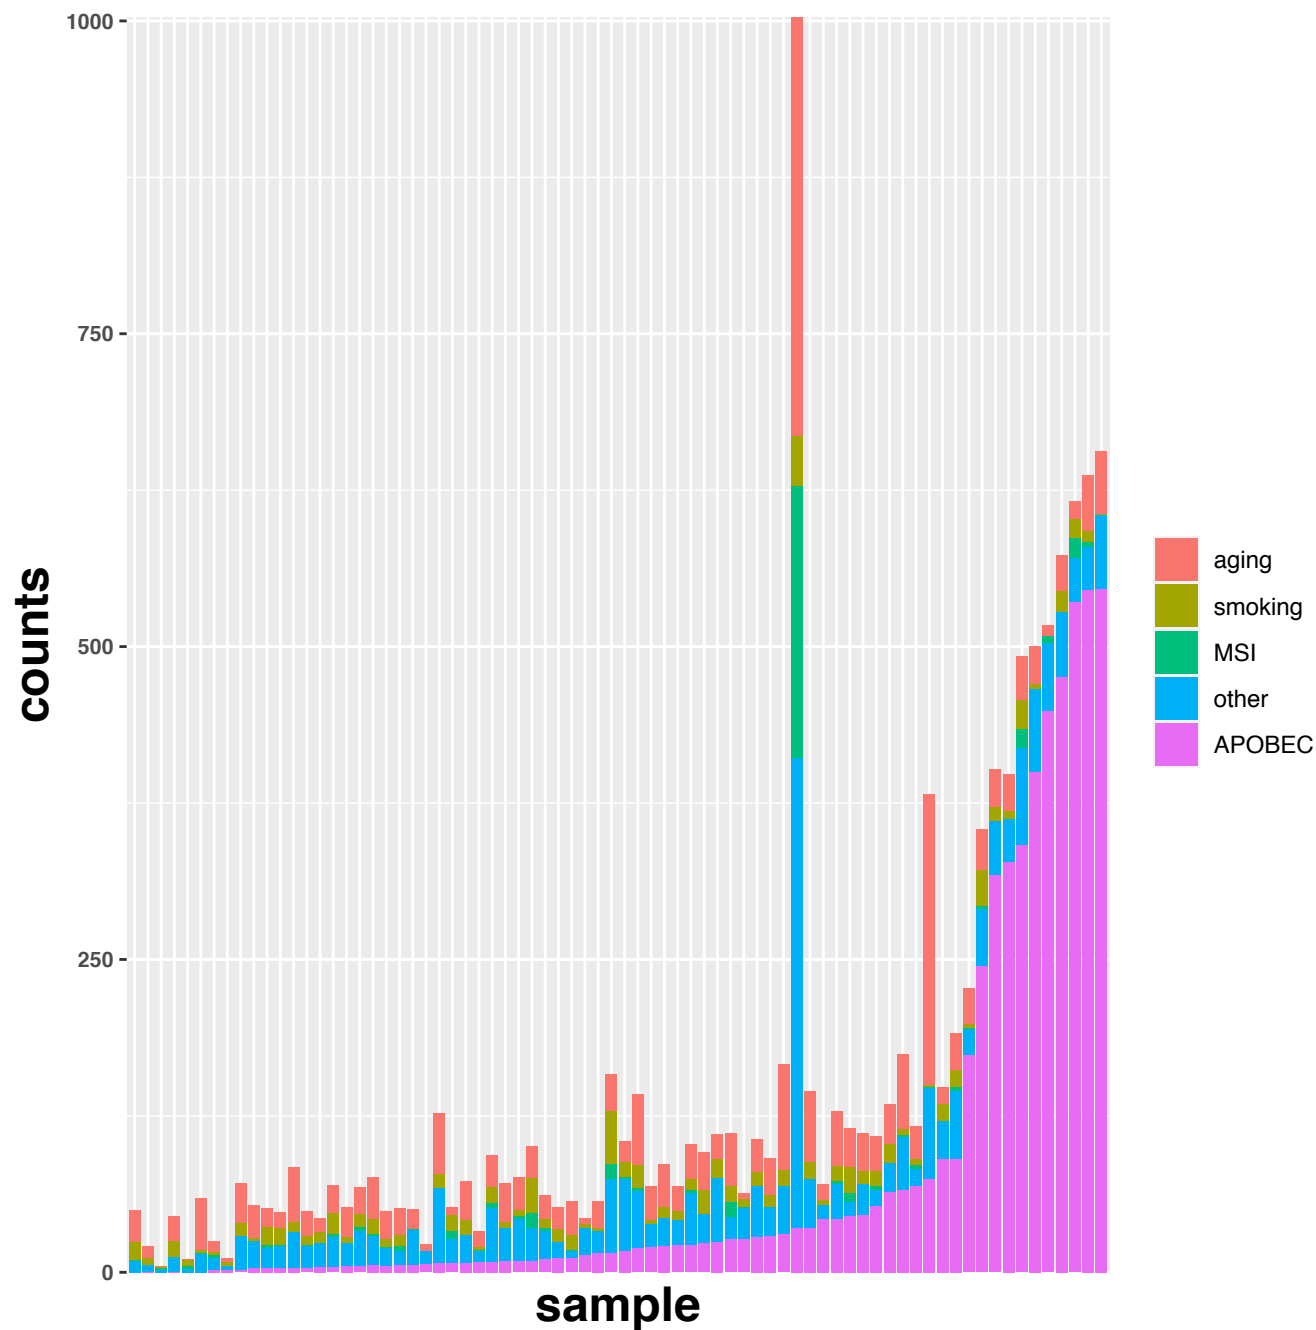

**Figure S2.** Expected (blue and red lines) vs actual (black dots) nonsynonymous/synonymous ratio for APOBEC (red) and non-APOBEC (blue) mutations by viral gene.

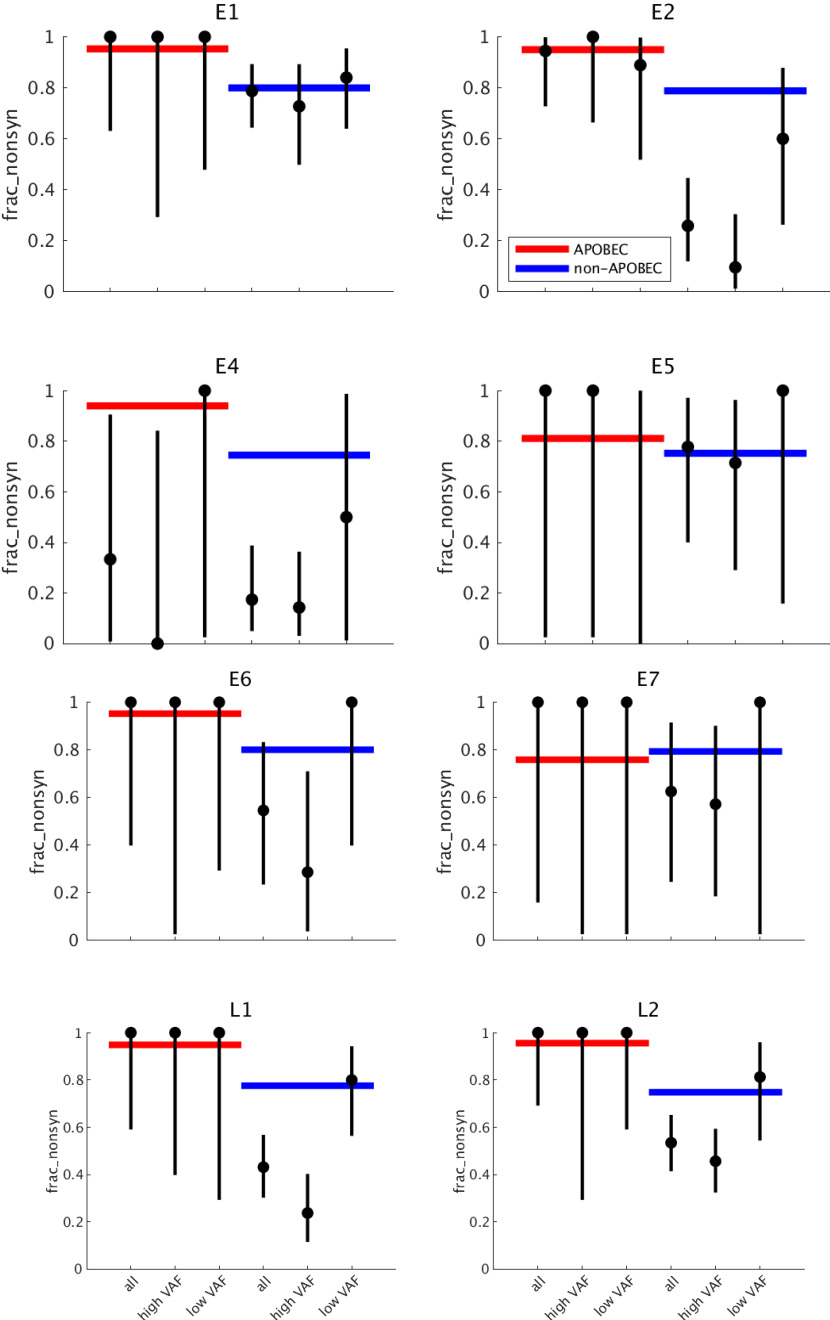

Supplement: s1 [file s1]
