# Supplementary material for: APOBEC Mutagenesis Is Concordant between Tumor and Viral Genomes in HPV-Positive Head and Neck Squamous Cell Carcinoma
Source: Viruses. 2021 Aug 23;13(8):1666. doi: 10.3390/v13081666 (PMC8402723; doi:10.3390/v13081666)
Supplement: Supplementary file 1 [file viruses-13-01666-s001.zip › supplementary material/viruses-1320495-supplementary.xlsx]

## Sheet: Sheet 1
patient	reference	pos	ref_allele	alt_allele	nalt	VAF	totcov	gene	amino_acid_change
IonCode_0201_33075_RD214	K02718	3799	C	G	42545	0.971325	43801	E2	p.Q349E
IonCode_0202_33009_RD214	K02718	2992	G	C	7353	0.20542	35795	E2	p.E80Q
IonCode_0202_33009_RD214	K02718	3799	C	G	16928	0.454467	37248	E2	p.Q349E
IonCode_0207_33090_RD214	K02718	3766	G	A	182	0.79476	229	E2	p.D338N
IonCode_0209_33142_RD214	AF534061	3785	G	C	9206	0.31297	29415	E2	p.E344Q
IonCode_0212_33263_RD214	K02718	2764	C	G	56285	0.924493	60882	E2	p.L4V
IonCode_0213_33265_RD214	K02718	2764	C	G	4725	0.266949	17700	E2	p.L4V
IonCode_0213_33265_RD214	K02718	3799	C	G	14491	0.382449	37890	E2	p.Q349E
IonCode_0221_33413_RD214	AF536179	3846	C	G	22914	0.971385	23589	E2	p.S364C
IonCode_0236_33333_RD214	AF536179	3846	C	G	36345	0.966006	37624	E2	p.S364C
IonCode_0237_33422_RD214	AF534061	3846	C	G	3775	0.259325	14557	E2	p.S364C
IonCode_0244_18_0303_RD214	K02718	3199	G	A	98	0.337931	290	E2	p.E149K
IonCode_0247_18_0306_RD214	AF536179	3767	G	A	4796	0.807407	5940	E2	p.D338N
IonCode_0250_18_0309_RD214	K02718	3799	C	G	66944	0.978056	68446	E2	p.Q349E
IonCode_0255_3L_RD214	K02718	3797	C	G	14219	0.99267	14324	E2	p.S348C
IonCode_0256_3R_RD214	K02718	3797	C	G	33423	0.981874	34040	E2	p.S348C
SC559650	K02718	2952	G	A	466	0.0327638	14223	E2	p.K66K
SC559650	K02718	3634	G	A	356	0.0255508	13933	E2	p.D294N
